# Supplementary material for: Circadian Clock Component BMAL1 in the Paraventricular Nucleus Regulates Glucose Metabolism
Source: MDPI journal article supplement (doi:10.3390/nu13124487), 2021-12-15
Supplement: s1 [file s1]

## Supplementary material

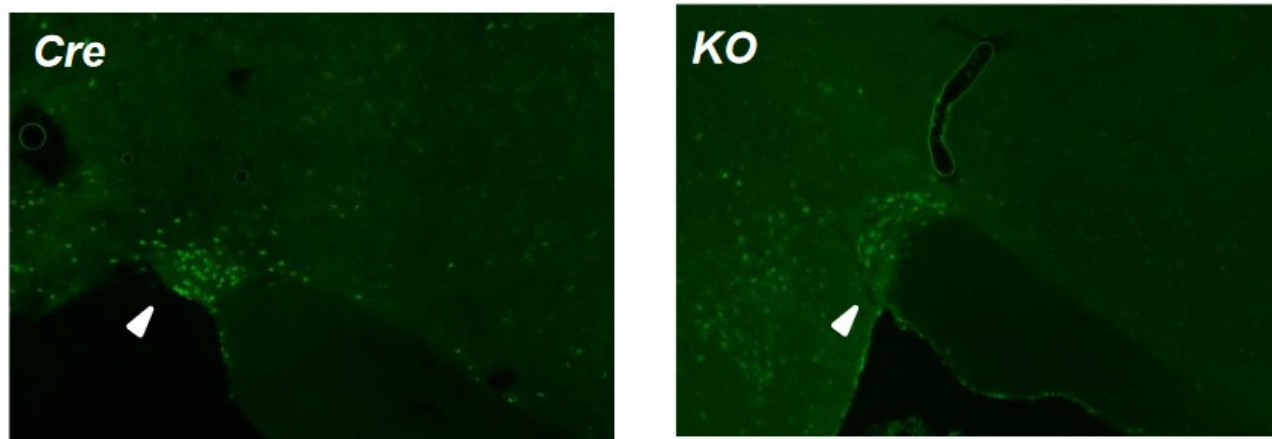

**Supplementary Figure S1.** Immunostaining for BMAL1 in the hypothalamic supraoptic nucleus (SON) (arrow head) of Cre and KO mice.

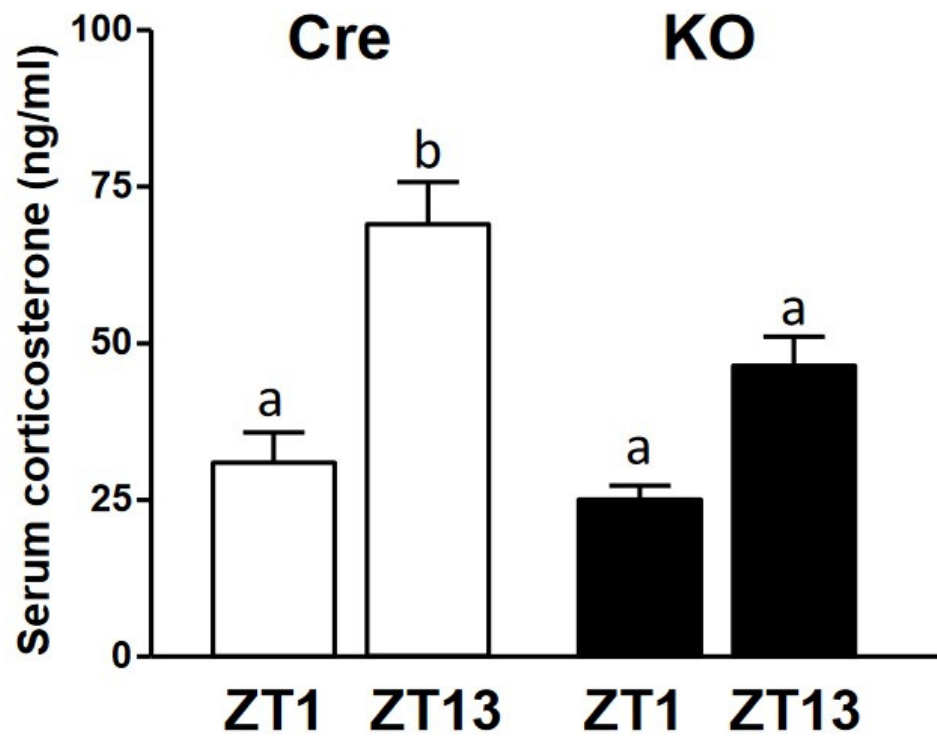

**Supplementary Figure S2.** Corticosterone levels were measured in the serum of at ZT1 and ZT13. Data are presented as mean  $\pm$  SEM. Different letters indicate  $p < 0.05$  by one- way ANOVA with Bonferroni multiple-comparison test.
